# Supplementary material for: One mean to rule them all? The arithmetic mean based egg reduction rate can be misleading when estimating anthelminthic drug efficacy in clinical trials
Source: PubMed Central journal article supplement (PMC7170292; doi:10.1371/journal.pntd.0008185), 2020-04-08

# Guidance regarding figure relationship and interpretation

## Example: Follow-up

| Agreement   | >50% votes:<br>B higher;<br>absolute majority | A more often but<br><50% (excl. <span style="background-color: yellow;">■</span> )<br>simple majority | >50% votes:<br>A higher;<br>absolute majority |
|-------------|-----------------------------------------------|-------------------------------------------------------------------------------------------------------|-----------------------------------------------|
| All studies | B higher                                      | A higher                                                                                              | A higher                                      |
| Consensus   | B higher                                      | Excluded                                                                                              | A higher                                      |

Fig 3

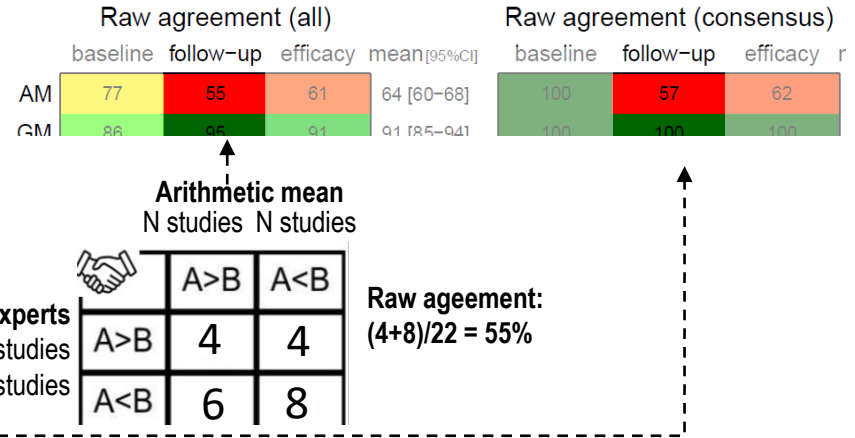

Fig 2

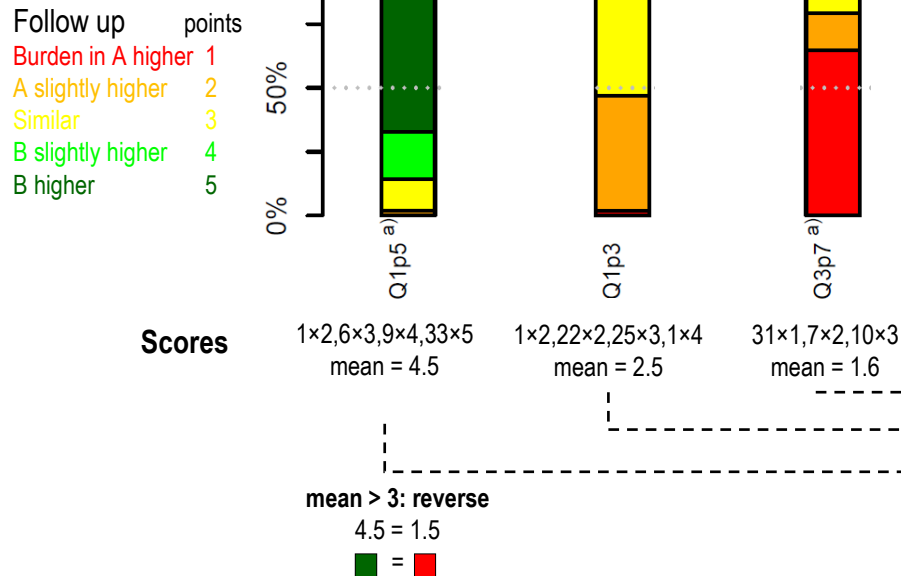

Fig 4

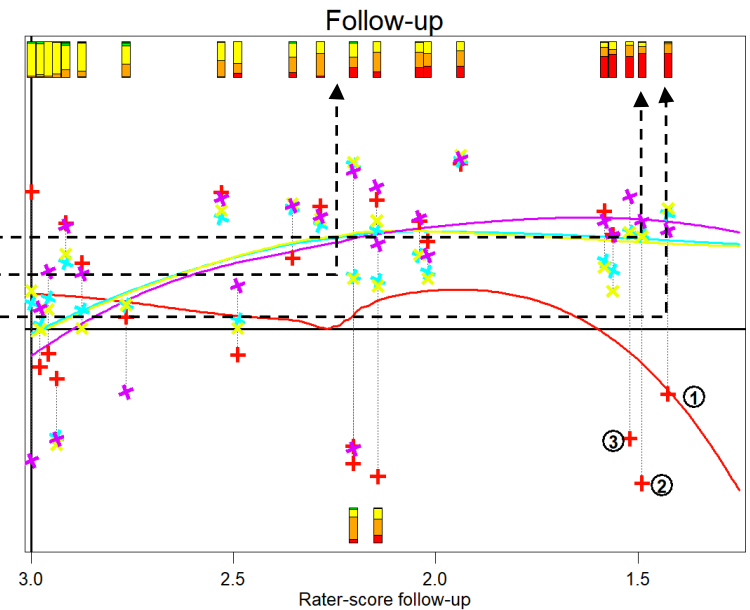

Supplement: pntd.0008185.s002.pdf [file pntd.0008185.s002.pdf]
